# Supplementary material for: The functional basis for variable antipredatory behavioral strategies in the chameleon Chamaeleo calyptratus
Source: Oxford University Press journal article supplement (doi:10.1242/jeb.242955), 2022-05-06
Supplement: jeb242955supp.pdf [file jeb242955supp.pdf]

**Table S1.** Model selection using Akaike’s information criterion corrected for small sample size (AICc) for aggression. Individual was treated as a random factor. Lower AICc values are indicative of better model predictive power. Model K indicates the number of predictors used in the model,  $\Delta$ AICc represents difference between a model’s AICc value and that of the best predictor model, and  $w_i$  is the AICc weight. Models with a  $\Delta$ AICc <2 are denoted in bold.

| <b>Aggression Models</b>                                                                                                                                                                    | <b>K</b> | <b>AICc</b> | <b><math>\Delta</math>AICc</b> | <b><math>w_i</math></b> |
|---------------------------------------------------------------------------------------------------------------------------------------------------------------------------------------------|----------|-------------|--------------------------------|-------------------------|
| <b>SVL + Relative Maximum Bite Force</b>                                                                                                                                                    | 2        | 4.14        | <b>0.00</b>                    | 0.28                    |
| <b>Habitat + SVL + Relative Maximum Bite Force</b>                                                                                                                                          | 3        | 4.94        | <b>0.79</b>                    | 0.19                    |
| <b>SVL</b>                                                                                                                                                                                  | 1        | 5.12        | <b>0.98</b>                    | 0.17                    |
| <b>Habitat</b>                                                                                                                                                                              | 1        | 5.29        | <b>1.14</b>                    | 0.16                    |
| <b>Habitat + SVL</b>                                                                                                                                                                        | 2        | 5.87        | <b>1.73</b>                    | 0.12                    |
| Relative Maximum Bite Force                                                                                                                                                                 | 1        | 8.08        | 3.94                           | 0.04                    |
| Habitat + Relative Maximum Bite Force                                                                                                                                                       | 2        | 8.83        | 4.69                           | 0.03                    |
| Habitat + SVL + Normalized Peak Velocity + Relative Maximum Bite Force                                                                                                                      | 4        | 9.39        | 5.25                           | 0.02                    |
| Habitat + SVL + Normalized Peak Velocity + Bird Color Space PC1 + Relative Maximum Bite Force                                                                                               | 5        | 17.77       | 13.63                          | 0.00                    |
| Habitat + SVL + Normalized Peak Velocity + Bird Color Space PC1 + Snake Color Space PC1 + Relative Maximum Bite Force                                                                       | 6        | 24.36       | 20.22                          | 0.00                    |
| Habitat + SVL + Normalized Peak Velocity + Bird Color Space PC1 + Snake Color Space PC1 + Snake Color Space PC2 + Relative Maximum Bite Force                                               | 7        | 27.20       | 23.06                          | 0.00                    |
| Habitat + SVL + Predator + Normalized Peak Velocity + Bird Color Space PC1 + Snake Color Space PC1 + Snake Color Space PC2 + Relative Maximum Bite Force                                    | 8        | 33.91       | 29.77                          | 0.00                    |
| Habitat + SVL + Predator + Normalized Peak Velocity + Bird Color Space PC1 + Snake Color Space PC1 + Snake Color Space PC2 + Relative Maximum Bite Force + Habitat*SVL                      | 9        | 43.32       | 39.18                          | 0.00                    |
| Habitat + SVL + Predator + Normalized Peak Velocity + Bird Color Space PC1 + Snake Color Space PC1 + Snake Color Space PC2 + Relative Maximum Bite Force + Habitat*SVL + Habitat*Normalized | 10       | 46.54       | 42.40                          | 0.00                    |

|                                                                                                                                                                                                                                                                                                                                                                                                   |    |        |        |      |
|---------------------------------------------------------------------------------------------------------------------------------------------------------------------------------------------------------------------------------------------------------------------------------------------------------------------------------------------------------------------------------------------------|----|--------|--------|------|
| Peak Velocity                                                                                                                                                                                                                                                                                                                                                                                     |    |        |        |      |
| Habitat + SVL + Predator + Normalized Peak Velocity + Bird Color Space PC1 + Snake Color Space PC1 + Snake Color Space PC2 + Relative Maximum Bite Force + Habitat*SVL + Habitat*Normalized Peak Velocity + Habitat*Bird Color Space PC1                                                                                                                                                          | 11 | 55.35  | 51.21  | 0.00 |
| Habitat + SVL + Predator + Normalized Peak Velocity + Bird Color Space PC1 + Snake Color Space PC1 + Snake Color Space PC2 + Relative Maximum Bite Force + Habitat*SVL + Habitat*Normalized Peak Velocity + Habitat*Bird Color Space PC1 + Habitat*Snake Color Space PC1                                                                                                                          | 12 | 62.47  | 58.32  | 0.00 |
| Habitat + SVL + Predator + Normalized Peak Velocity + Bird Color Space PC1 + Snake Color Space PC1 + Snake Color Space PC2 + Relative Maximum Bite Force + Habitat*SVL + Habitat*Normalized Peak Velocity + Habitat*Bird Color Space PC1 + Habitat*Snake Color Space PC1 + Habitat*Snake Color Space PC2                                                                                          | 13 | 66.42  | 62.28  | 0.00 |
| Habitat + SVL + Predator + Normalized Peak Velocity + Bird Color Space PC1 + Snake Color Space PC1 + Snake Color Space PC2 + Relative Maximum Bite Force + Habitat*SVL + Habitat*Normalized Peak Velocity + Habitat*Bird Color Space PC1 + Habitat*Snake Color Space PC1 + Habitat*Snake Color Space PC2 + Habitat*Relative Maximum Bite Force                                                    | 14 | 79.41  | 75.27  | 0.00 |
| Habitat + SVL + Predator + Normalized Peak Velocity + Bird Color Space PC1 + Snake Color Space PC1 + Snake Color Space PC2 + Relative Maximum Bite Force + Habitat*SVL + Habitat*Normalized Peak Velocity + Habitat*Bird Color Space PC1 + Habitat*Snake Color Space PC1 + Habitat*Snake Color Space PC2 + Habitat*Relative Maximum Bite Force + Predator*SVL                                     | 15 | 90.98  | 86.84  | 0.00 |
| Habitat + SVL + Predator + Normalized Peak Velocity + Bird Color Space PC1 + Snake Color Space PC1 + Snake Color Space PC2 + Relative Maximum Bite Force + Habitat*SVL + Habitat*Normalized Peak Velocity + Habitat*Bird Color Space PC1 + Habitat*Snake Color Space PC1 + Habitat*Snake Color Space PC2 + Habitat*Relative Maximum Bite Force + Predator*SVL + Predator*Normalized Peak Velocity | 16 | 97.63  | 93.49  | 0.00 |
| Habitat + SVL + Predator + Normalized Peak Velocity + Bird Color Space PC1 + Snake Color Space PC1 + Snake Color Space PC2 +                                                                                                                                                                                                                                                                      | 17 | 104.27 | 100.13 | 0.00 |

|                                                                                                                                                                                                                                                                                                                                                                                                                                                                                                                                            |    |        |        |      |
|--------------------------------------------------------------------------------------------------------------------------------------------------------------------------------------------------------------------------------------------------------------------------------------------------------------------------------------------------------------------------------------------------------------------------------------------------------------------------------------------------------------------------------------------|----|--------|--------|------|
| Relative Maximum Bite Force + Habitat*SVL + Habitat*Normalized Peak Velocity + Habitat*Bird Color Space PC1 + Habitat*Snake Color Space PC1 + Habitat*Snake Color Space PC2 + Habitat*Relative Maximum Bite Force + Predator*SVL + Predator*Normalized Peak Velocity + Predator*Bird Color Space PC1                                                                                                                                                                                                                                       |    |        |        |      |
| Habitat + SVL + Predator + Normalized Peak Velocity + Bird Color Space PC1 + Snake Color Space PC1 + Snake Color Space PC2 + Relative Maximum Bite Force + Habitat*SVL + Habitat*Normalized Peak Velocity + Habitat*Bird Color Space PC1 + Habitat*Snake Color Space PC1 + Habitat*Snake Color Space PC2 + Habitat*Relative Maximum Bite Force + Predator*SVL + Predator*Normalized Peak Velocity + Predator*Bird Color Space PC1 + Predator*Snake Color Space PC1                                                                         | 18 | 111.75 | 107.60 | 0.00 |
| Habitat + SVL + Predator + Normalized Peak Velocity + Bird Color Space PC1 + Snake Color Space PC1 + Snake Color Space PC2 + Relative Maximum Bite Force + Habitat*SVL + Habitat*Normalized Peak Velocity + Habitat*Bird Color Space PC1 + Habitat*Snake Color Space PC1 + Habitat*Snake Color Space PC2 + Habitat*Relative Maximum Bite Force + Predator*SVL + Predator*Normalized Peak Velocity + Predator*Bird Color Space PC1 + Predator*Snake Color Space PC1 + Predator*Snake Color Space PC2                                        | 19 | 119.14 | 114.99 | 0.00 |
| Habitat + SVL + Predator + Normalized Peak Velocity + Bird Color Space PC1 + Snake Color Space PC1 + Snake Color Space PC2 + Relative Maximum Bite Force + Habitat*SVL + Habitat*Normalized Peak Velocity + Habitat*Bird Color Space PC1 + Habitat*Snake Color Space PC1 + Habitat*Snake Color Space PC2 + Habitat*Relative Maximum Bite Force + Predator*SVL + Predator*Normalized Peak Velocity + Predator*Bird Color Space PC1 + Predator*Snake Color Space PC1 + Predator*Snake Color Space PC2 + Predator*Relative Maximum Bite Force | 20 | 132.86 | 128.72 | 0.00 |

**Table S2.** AICc model selection for fleeing behavior. Individual was treated as a random factor. Abbreviations as in Supplementary Table 3. Models with a  $\Delta AICc < 2$  are denoted in bold.

| <b>Fleeing Models</b>                                                                                                                                                                                                                    | <b>K</b> | <b>AICc</b> | <b><math>\Delta AICc</math></b> | <b>wi</b> |
|------------------------------------------------------------------------------------------------------------------------------------------------------------------------------------------------------------------------------------------|----------|-------------|---------------------------------|-----------|
| <b>Habitat + Normalized Peak Velocity</b>                                                                                                                                                                                                | 2        | 79.14       | <b>0.00</b>                     | 0.72      |
| Normalized Peak Velocity                                                                                                                                                                                                                 | 1        | 81.37       | 2.23                            | 0.23      |
| Habitat + SVL + Normalized Peak Velocity                                                                                                                                                                                                 | 3        | 85.47       | 6.33                            | 0.03      |
| Habitat                                                                                                                                                                                                                                  | 1        | 86.40       | 7.26                            | 0.02      |
| Habitat + SVL + Normalized Peak Velocity + Relative Maximum Bite Force                                                                                                                                                                   | 4        | 95.53       | 16.39                           | 0.00      |
| Habitat + SVL + Predator + Normalized Peak Velocity + Relative Maximum Bite Force                                                                                                                                                        | 5        | 101.70      | 22.56                           | 0.00      |
| Habitat + SVL + Predator + Normalized Peak Velocity + Bird Color Space PC1 + Relative Maximum Bite Force                                                                                                                                 | 6        | 109.67      | 30.53                           | 0.00      |
| Habitat + SVL + Predator + Normalized Peak Velocity + Bird Color Space PC1 + Snake Color Space PC1 + Relative Maximum Bite Force                                                                                                         | 7        | 115.26      | 36.12                           | 0.00      |
| Habitat + SVL + Predator + Normalized Peak Velocity + Bird Color Space PC1 + Snake Color Space PC1 + Snake Color Space PC2 + Relative Maximum Bite Force                                                                                 | 8        | 122.38      | 43.24                           | 0.00      |
| Habitat + SVL + Predator + Normalized Peak Velocity + Bird Color Space PC1 + Snake Color Space PC1 + Snake Color Space PC2 + Relative Maximum Bite Force + Habitat*SVL                                                                   | 9        | 129.11      | 49.97                           | 0.00      |
| Habitat + SVL + Predator + Normalized Peak Velocity + Bird Color Space PC1 + Snake Color Space PC1 + Snake Color Space PC2 + Relative Maximum Bite Force + Habitat*SVL + Habitat*Normalized Peak Velocity                                | 10       | 134.19      | 55.05                           | 0.00      |
| Habitat + SVL + Predator + Normalized Peak Velocity + Bird Color Space PC1 + Snake Color Space PC1 + Snake Color Space PC2 + Relative Maximum Bite Force + Habitat*SVL + Habitat*Normalized Peak Velocity + Habitat*Bird Color Space PC1 | 11       | 139.36      | 60.22                           | 0.00      |
| Habitat + SVL + Predator + Normalized Peak Velocity + Bird Color Space PC1 + Snake Color Space PC1 + Snake Color Space PC2 + Relative Maximum Bite Force + Habitat*SVL + Habitat*Normalized Peak                                         | 12       | 145.37      | 66.23                           | 0.00      |

|                                                                                                                                                                                                                                                                                                                                                                                                                                   |    |        |        |      |
|-----------------------------------------------------------------------------------------------------------------------------------------------------------------------------------------------------------------------------------------------------------------------------------------------------------------------------------------------------------------------------------------------------------------------------------|----|--------|--------|------|
| Velocity + Habitat*Bird Color Space PC1 + Habitat*Snake Color Space PC1                                                                                                                                                                                                                                                                                                                                                           |    |        |        |      |
| Habitat + SVL + Predator + Normalized Peak Velocity + Bird Color Space PC1 + Snake Color Space PC1 + Snake Color Space PC2 + Relative Maximum Bite Force + Habitat*SVL + Habitat*Normalized Peak Velocity + Habitat*Bird Color Space PC1 + Habitat*Snake Color Space PC1 + Habitat*Snake Color Space PC2                                                                                                                          | 13 | 150.90 | 71.76  | 0.00 |
| Habitat + SVL + Predator + Normalized Peak Velocity + Bird Color Space PC1 + Snake Color Space PC1 + Snake Color Space PC2 + Relative Maximum Bite Force + Habitat*SVL + Habitat*Normalized Peak Velocity + Habitat*Bird Color Space PC1 + Habitat*Snake Color Space PC1 + Habitat*Snake Color Space PC2 + Habitat*Relative Maximum Bite Force                                                                                    | 14 | 163.16 | 84.02  | 0.00 |
| Habitat + SVL + Predator + Normalized Peak Velocity + Bird Color Space PC1 + Snake Color Space PC1 + Snake Color Space PC2 + Relative Maximum Bite Force + Habitat*SVL + Habitat*Normalized Peak Velocity + Habitat*Bird Color Space PC1 + Habitat*Snake Color Space PC1 + Habitat*Snake Color Space PC2 + Habitat*Relative Maximum Bite Force + Predator*SVL                                                                     | 15 | 173.70 | 94.56  | 0.00 |
| Habitat + SVL + Predator + Normalized Peak Velocity + Bird Color Space PC1 + Snake Color Space PC1 + Snake Color Space PC2 + Relative Maximum Bite Force + Habitat*SVL + Habitat*Normalized Peak Velocity + Habitat*Bird Color Space PC1 + Habitat*Snake Color Space PC1 + Habitat*Snake Color Space PC2 + Habitat*Relative Maximum Bite Force + Predator*SVL + Predator*Normalized Peak Velocity                                 | 16 | 179.26 | 100.12 | 0.00 |
| Habitat + SVL + Predator + Normalized Peak Velocity + Bird Color Space PC1 + Snake Color Space PC1 + Snake Color Space PC2 + Relative Maximum Bite Force + Habitat*SVL + Habitat*Normalized Peak Velocity + Habitat*Bird Color Space PC1 + Habitat*Snake Color Space PC1 + Habitat*Snake Color Space PC2 + Habitat*Relative Maximum Bite Force + Predator*SVL + Predator*Normalized Peak Velocity + Predator*Bird Color Space PC1 | 17 | 186.53 | 107.39 | 0.00 |
| Habitat + SVL + Predator + Normalized Peak Velocity + Bird Color Space PC1 + Snake Color Space PC1 + Snake Color Space PC2 + Relative Maximum Bite Force + Habitat*SVL + Habitat*Normalized Peak Velocity + Habitat*Bird Color Space PC1 + Habitat*Snake Color Space                                                                                                                                                              | 18 | 192.53 | 113.39 | 0.00 |

|                                                                                                                                                                                                                                                                                                                                                                                                                                                                                                                                            |    |        |        |      |
|--------------------------------------------------------------------------------------------------------------------------------------------------------------------------------------------------------------------------------------------------------------------------------------------------------------------------------------------------------------------------------------------------------------------------------------------------------------------------------------------------------------------------------------------|----|--------|--------|------|
| PC1 + Habitat*Snake Color Space PC2 + Habitat*Relative Maximum Bite Force + Predator*SVL + Predator*Normalized Peak Velocity + Predator*Bird Color Space PC1 + Predator*Snake Color Space PC1                                                                                                                                                                                                                                                                                                                                              |    |        |        |      |
| Habitat + SVL + Predator + Normalized Peak Velocity + Bird Color Space PC1 + Snake Color Space PC1 + Snake Color Space PC2 + Relative Maximum Bite Force + Habitat*SVL + Habitat*Normalized Peak Velocity + Habitat*Bird Color Space PC1 + Habitat*Snake Color Space PC1 + Habitat*Snake Color Space PC2 + Habitat*Relative Maximum Bite Force + Predator*SVL + Predator*Normalized Peak Velocity + Predator*Bird Color Space PC1 + Predator*Snake Color Space PC1 + Predator*Snake Color Space PC2                                        | 19 | 199.80 | 120.66 | 0.00 |
| Habitat + SVL + Predator + Normalized Peak Velocity + Bird Color Space PC1 + Snake Color Space PC1 + Snake Color Space PC2 + Relative Maximum Bite Force + Habitat*SVL + Habitat*Normalized Peak Velocity + Habitat*Bird Color Space PC1 + Habitat*Snake Color Space PC1 + Habitat*Snake Color Space PC2 + Habitat*Relative Maximum Bite Force + Predator*SVL + Predator*Normalized Peak Velocity + Predator*Bird Color Space PC1 + Predator*Snake Color Space PC1 + Predator*Snake Color Space PC2 + Predator*Relative Maximum Bite Force | 20 | 212.39 | 133.25 | 0.00 |

**Table S3.** AICc model selection for crypsis behavior. Individual was treated as a random factor. Abbreviations as in Supplementary Table 3. Models with a  $\Delta AICc < 2$  are denoted in bold.

| <b>Crypsis Models</b>                                                                                                                                                                                 | <b>K</b> | <b>AICc</b> | <b><math>\Delta AICc</math></b> | <b>wi</b> |
|-------------------------------------------------------------------------------------------------------------------------------------------------------------------------------------------------------|----------|-------------|---------------------------------|-----------|
| <b>Habitat + Bird Color Space PC1 + Habitat*Bird Color Space PC1</b>                                                                                                                                  | 3        | -67.75      | <b>0.00</b>                     | 0.25      |
| <b>Habitat + Habitat*Bird Color Space PC1</b>                                                                                                                                                         | 2        | -67.75      | <b>0.00</b>                     | 0.25      |
| <b>Bird Color Space PC1 + Habitat*Bird Color Space PC1</b>                                                                                                                                            | 2        | -67.75      | <b>0.00</b>                     | 0.25      |
| <b>Habitat*Bird Color Space PC1</b>                                                                                                                                                                   | 1        | -67.75      | <b>0.00</b>                     | 0.25      |
| Habitat                                                                                                                                                                                               | 1        | -60.33      | 7.42                            | 0.01      |
| Habitat + Bird Color Space PC1                                                                                                                                                                        | 2        | -59.25      | 8.50                            | 0.00      |
| Habitat + SVL + Bird Color Space PC1 + Habitat*Bird Color Space PC1                                                                                                                                   | 4        | -57.98      | 9.76                            | 0.00      |
| Bird Color Space PC1                                                                                                                                                                                  | 1        | -57.76      | 9.99                            | 0.00      |
| Habitat + SVL + Normalized Peak Velocity + Bird Color Space PC1 + Habitat*Bird Color Space PC1                                                                                                        | 5        | -50.78      | 16.97                           | 0.00      |
| Habitat + SVL + Predator + Normalized Peak Velocity + Bird Color Space PC1 + Habitat*Bird Color Space PC1                                                                                             | 6        | -44.55      | 23.20                           | 0.00      |
| Habitat + SVL + Predator + Normalized Peak Velocity + Bird Color Space PC1 + Snake Color Space PC1 + Habitat*Bird Color Space PC1                                                                     | 7        | -36.49      | 31.26                           | 0.00      |
| Habitat + SVL + Predator + Normalized Peak Velocity + Bird Color Space PC1 + Snake Color Space PC1 + Snake Color Space PC2 + Habitat*Bird Color Space PC1                                             | 8        | -27.60      | 40.14                           | 0.00      |
| Habitat + SVL + Predator + Normalized Peak Velocity + Bird Color Space PC1 + Snake Color Space PC1 + Snake Color Space PC2 + Relative Maximum Bite Force + Habitat*Bird Color Space PC1               | 9        | -13.51      | 54.24                           | 0.00      |
| Habitat + SVL + Predator + Normalized Peak Velocity + Bird Color Space PC1 + Snake Color Space PC1 + Snake Color Space PC2 + Relative Maximum Bite Force + Habitat*SVL + Habitat*Bird Color Space PC1 | 10       | -5.72       | 62.02                           | 0.00      |
| Habitat + SVL + Predator + Normalized Peak Velocity + Bird Color Space PC1 + Snake Color Space PC1 + Snake Color Space PC2 + Relative Maximum Bite Force + Habitat*SVL + Habitat*Normalized           | 11       | 0.88        | 68.63                           | 0.00      |

|                                                                                                                                                                                                                                                                                                                                                                                                   |    |       |        |      |
|---------------------------------------------------------------------------------------------------------------------------------------------------------------------------------------------------------------------------------------------------------------------------------------------------------------------------------------------------------------------------------------------------|----|-------|--------|------|
| Peak Velocity + Habitat*Bird Color Space PC1                                                                                                                                                                                                                                                                                                                                                      |    |       |        |      |
| Habitat + SVL + Predator + Normalized Peak Velocity + Bird Color Space PC1 + Snake Color Space PC1 + Snake Color Space PC2 + Relative Maximum Bite Force + Habitat*SVL + Habitat*Normalized Peak Velocity + Habitat*Bird Color Space PC1 + Habitat*Snake Color Space PC1                                                                                                                          | 12 | 8.45  | 76.20  | 0.00 |
| Habitat + SVL + Predator + Normalized Peak Velocity + Bird Color Space PC1 + Snake Color Space PC1 + Snake Color Space PC2 + Relative Maximum Bite Force + Habitat*SVL + Habitat*Normalized Peak Velocity + Habitat*Bird Color Space PC1 + Habitat*Snake Color Space PC1 + Habitat*Snake Color Space PC2                                                                                          | 13 | 16.91 | 84.66  | 0.00 |
| Habitat + SVL + Predator + Normalized Peak Velocity + Bird Color Space PC1 + Snake Color Space PC1 + Snake Color Space PC2 + Relative Maximum Bite Force + Habitat*SVL + Habitat*Normalized Peak Velocity + Habitat*Bird Color Space PC1 + Habitat*Snake Color Space PC1 + Habitat*Snake Color Space PC2 + Habitat*Relative Maximum Bite Force                                                    | 14 | 30.41 | 98.15  | 0.00 |
| Habitat + SVL + Predator + Normalized Peak Velocity + Bird Color Space PC1 + Snake Color Space PC1 + Snake Color Space PC2 + Relative Maximum Bite Force + Habitat*SVL + Habitat*Normalized Peak Velocity + Habitat*Bird Color Space PC1 + Habitat*Snake Color Space PC1 + Habitat*Snake Color Space PC2 + Habitat*Relative Maximum Bite Force + Predator*SVL                                     | 15 | 39.95 | 107.70 | 0.00 |
| Habitat + SVL + Predator + Normalized Peak Velocity + Bird Color Space PC1 + Snake Color Space PC1 + Snake Color Space PC2 + Relative Maximum Bite Force + Habitat*SVL + Habitat*Normalized Peak Velocity + Habitat*Bird Color Space PC1 + Habitat*Snake Color Space PC1 + Habitat*Snake Color Space PC2 + Habitat*Relative Maximum Bite Force + Predator*SVL + Predator*Normalized Peak Velocity | 16 | 46.85 | 114.60 | 0.00 |
| Habitat + SVL + Predator + Normalized Peak Velocity + Bird Color Space PC1 + Snake Color Space PC1 + Snake Color Space PC2 + Relative Maximum Bite Force + Habitat*SVL + Habitat*Normalized Peak Velocity + Habitat*Bird Color Space PC1 + Habitat*Snake Color Space PC1 + Habitat*Snake Color Space PC2 + Habitat*Relative Maximum Bite Force + Predator*SVL + Predator*Normalized Peak          | 17 | 53.76 | 121.51 | 0.00 |



|                                                                                                                                                                                                                                                                                                                                                                                                                                                                                                                                            |    |       |        |      |
|--------------------------------------------------------------------------------------------------------------------------------------------------------------------------------------------------------------------------------------------------------------------------------------------------------------------------------------------------------------------------------------------------------------------------------------------------------------------------------------------------------------------------------------------|----|-------|--------|------|
| Velocity + Predator*Bird Color Space PC1                                                                                                                                                                                                                                                                                                                                                                                                                                                                                                   |    |       |        |      |
| Habitat + SVL + Predator + Normalized Peak Velocity + Bird Color Space PC1 + Snake Color Space PC1 + Snake Color Space PC2 + Relative Maximum Bite Force + Habitat*SVL + Habitat*Normalized Peak Velocity + Habitat*Bird Color Space PC1 + Habitat*Snake Color Space PC1 + Habitat*Snake Color Space PC2 + Habitat*Relative Maximum Bite Force + Predator*SVL + Predator*Normalized Peak Velocity + Predator*Bird Color Space PC1 + Predator*Snake Color Space PC1                                                                         | 18 | 61.73 | 129.47 | 0.00 |
| Habitat + SVL + Predator + Normalized Peak Velocity + Bird Color Space PC1 + Snake Color Space PC1 + Snake Color Space PC2 + Relative Maximum Bite Force + Habitat*SVL + Habitat*Normalized Peak Velocity + Habitat*Bird Color Space PC1 + Habitat*Snake Color Space PC1 + Habitat*Snake Color Space PC2 + Habitat*Relative Maximum Bite Force + Predator*SVL + Predator*Normalized Peak Velocity + Predator*Bird Color Space PC1 + Predator*Snake Color Space PC1 + Predator*Snake Color Space PC2                                        | 19 | 70.33 | 138.08 | 0.00 |
| Habitat + SVL + Predator + Normalized Peak Velocity + Bird Color Space PC1 + Snake Color Space PC1 + Snake Color Space PC2 + Relative Maximum Bite Force + Habitat*SVL + Habitat*Normalized Peak Velocity + Habitat*Bird Color Space PC1 + Habitat*Snake Color Space PC1 + Habitat*Snake Color Space PC2 + Habitat*Relative Maximum Bite Force + Predator*SVL + Predator*Normalized Peak Velocity + Predator*Bird Color Space PC1 + Predator*Snake Color Space PC1 + Predator*Snake Color Space PC2 + Predator*Relative Maximum Bite Force | 20 | 84.53 | 152.28 | 0.00 |

**Table S4.** AICc model selection for the ring-flip behavior. Individual was treated as a random factor. Abbreviations as in Supplementary Table 3. Models with a  $\Delta$ AICc <2 are denoted in bold.

| <b>Ring-flip Models</b>                                                                                                                                                                                                                                                  | <b>K</b> | <b>AICc</b> | <b><math>\Delta</math>AICc</b> | <b>wi</b> |
|--------------------------------------------------------------------------------------------------------------------------------------------------------------------------------------------------------------------------------------------------------------------------|----------|-------------|--------------------------------|-----------|
| <b>Habitat + Normalized Peak Velocity + Habitat*Normalized Peak Velocity</b>                                                                                                                                                                                             | 3        | -4.02       | <b>0.00</b>                    | 0.25      |
| <b>Habitat + Habitat*Normalized Peak Velocity</b>                                                                                                                                                                                                                        | 2        | -4.02       | <b>0.00</b>                    | 0.25      |
| <b>Normalized Peak Velocity + Habitat*Normalized Peak Velocity</b>                                                                                                                                                                                                       | 2        | -4.02       | <b>0.00</b>                    | 0.25      |
| <b>Habitat*Normalized Peak Velocity</b>                                                                                                                                                                                                                                  | 1        | -4.02       | <b>0.00</b>                    | 0.25      |
| Habitat + SVL + Normalized Peak Velocity + Habitat*Normalized Peak Velocity                                                                                                                                                                                              | 4        | 5.35        | 9.37                           | 0.00      |
| Habitat + Normalized Peak Velocity                                                                                                                                                                                                                                       | 2        | 7.59        | 11.61                          | 0.00      |
| Habitat + SVL + Predator + Normalized Peak Velocity + Habitat*Normalized Peak Velocity                                                                                                                                                                                   | 5        | 12.23       | 16.25                          | 0.00      |
| Habitat                                                                                                                                                                                                                                                                  | 1        | 13.12       | 17.14                          | 0.00      |
| Habitat + SVL + Predator + Normalized Peak Velocity + Bird Color Space PC1 + Habitat*Normalized Peak Velocity                                                                                                                                                            | 6        | 19.23       | 23.25                          | 0.00      |
| Habitat + SVL + Predator + Normalized Peak Velocity + Bird Color Space PC1 + Snake Color Space PC1 + Habitat*Normalized Peak Velocity                                                                                                                                    | 7        | 26.52       | 30.54                          | 0.00      |
| Normalized Peak Velocity                                                                                                                                                                                                                                                 | 1        | 31.30       | 35.32                          | 0.00      |
| Habitat + SVL + Predator + Normalized Peak Velocity + Bird Color Space PC1 + Snake Color Space PC1 + Snake Color Space PC2 + Habitat*Normalized Peak Velocity                                                                                                            | 8        | 35.11       | 39.13                          | 0.00      |
| Habitat + SVL + Predator + Normalized Peak Velocity + Bird Color Space PC1 + Snake Color Space PC1 + Snake Color Space PC2 + Relative Maximum Bite Force + Habitat*Normalized Peak Velocity                                                                              | 9        | 48.66       | 52.68                          | 0.00      |
| Habitat + SVL + Predator + Normalized Peak Velocity + Bird Color Space PC1 + Snake Color Space PC1 + Snake Color Space PC2 + Relative Maximum Bite Force + Habitat*SVL + Habitat*Normalized Peak Velocity                                                                | 10       | 57.68       | 61.70                          | 0.00      |
| Habitat + SVL + Predator + Normalized Peak Velocity + Bird Color Space PC1 + Snake Color Space PC1 + Snake Color Space PC2 + Relative Maximum Bite Force + Habitat*SVL + Habitat*Normalized Peak Velocity + Habitat*Bird Color Space PC1                                 | 11       | 64.30       | 68.32                          | 0.00      |
| Habitat + SVL + Predator + Normalized Peak Velocity + Bird Color Space PC1 + Snake Color Space PC1 + Snake Color Space PC2 + Relative Maximum Bite Force + Habitat*SVL + Habitat*Normalized Peak Velocity + Habitat*Bird Color Space PC1 + Habitat*Snake Color Space PC1 | 12       | 70.07       | 74.08                          | 0.00      |
| Habitat + SVL + Predator + Normalized Peak Velocity + Bird Color Space PC1 + Snake Color Space PC1 +                                                                                                                                                                     | 13       | 77.63       | 81.65                          | 0.00      |

|                                                                                                                                                                                                                                                                                                                                                                                                                                                                                                                                            |    |        |        |      |
|--------------------------------------------------------------------------------------------------------------------------------------------------------------------------------------------------------------------------------------------------------------------------------------------------------------------------------------------------------------------------------------------------------------------------------------------------------------------------------------------------------------------------------------------|----|--------|--------|------|
| Snake Color Space PC2 + Relative Maximum Bite Force + Habitat*SVL + Habitat*Normalized Peak Velocity + Habitat*Bird Color Space PC1 + Habitat*Snake Color Space PC1 + Habitat*Snake Color Space PC2                                                                                                                                                                                                                                                                                                                                        |    |        |        |      |
| Habitat + SVL + Predator + Normalized Peak Velocity + Bird Color Space PC1 + Snake Color Space PC1 + Snake Color Space PC2 + Relative Maximum Bite Force + Habitat*SVL + Habitat*Normalized Peak Velocity + Habitat*Bird Color Space PC1 + Habitat*Snake Color Space PC1 + Habitat*Snake Color Space PC2 + Habitat*Relative Maximum Bite Force                                                                                                                                                                                             | 14 | 90.47  | 94.49  | 0.00 |
| Habitat + SVL + Predator + Normalized Peak Velocity + Bird Color Space PC1 + Snake Color Space PC1 + Snake Color Space PC2 + Relative Maximum Bite Force + Habitat*SVL + Habitat*Normalized Peak Velocity + Habitat*Bird Color Space PC1 + Habitat*Snake Color Space PC1 + Habitat*Snake Color Space PC2 + Habitat*Relative Maximum Bite Force + Predator*SVL                                                                                                                                                                              | 15 | 100.74 | 104.76 | 0.00 |
| Habitat + SVL + Predator + Normalized Peak Velocity + Bird Color Space PC1 + Snake Color Space PC1 + Snake Color Space PC2 + Relative Maximum Bite Force + Habitat*SVL + Habitat*Normalized Peak Velocity + Habitat*Bird Color Space PC1 + Habitat*Snake Color Space PC1 + Habitat*Snake Color Space PC2 + Habitat*Relative Maximum Bite Force + Predator*SVL + Predator*Normalized Peak Velocity                                                                                                                                          | 16 | 106.62 | 110.64 | 0.00 |
| Habitat + SVL + Predator + Normalized Peak Velocity + Bird Color Space PC1 + Snake Color Space PC1 + Snake Color Space PC2 + Relative Maximum Bite Force + Habitat*SVL + Habitat*Normalized Peak Velocity + Habitat*Bird Color Space PC1 + Habitat*Snake Color Space PC1 + Habitat*Snake Color Space PC2 + Habitat*Relative Maximum Bite Force + Predator*SVL + Predator*Normalized Peak Velocity + Predator*Bird Color Space PC1                                                                                                          | 17 | 114.84 | 118.86 | 0.00 |
| Habitat + SVL + Predator + Normalized Peak Velocity + Bird Color Space PC1 + Snake Color Space PC1 + Snake Color Space PC2 + Relative Maximum Bite Force + Habitat*SVL + Habitat*Normalized Peak Velocity + Habitat*Bird Color Space PC1 + Habitat*Snake Color Space PC1 + Habitat*Snake Color Space PC2 + Habitat*Relative Maximum Bite Force + Predator*SVL + Predator*Normalized Peak Velocity + Predator*Bird Color Space PC1 + Predator*Snake Color Space PC1                                                                         | 18 | 121.61 | 125.63 | 0.00 |
| Habitat + SVL + Predator + Normalized Peak Velocity + Bird Color Space PC1 + Snake Color Space PC1 + Snake Color Space PC2 + Relative Maximum Bite Force + Habitat*SVL + Habitat*Normalized Peak Velocity + Habitat*Bird Color Space PC1 + Habitat*Snake Color Space PC1 + Habitat*Snake Color Space PC2 + Habitat*Relative Maximum Bite Force + Predator*SVL + Predator*Normalized Peak Velocity + Predator*Bird Color Space PC1 + Predator*Snake Color Space PC1 + Predator*Snake Color Space PC2                                        | 19 | 125.82 | 129.83 | 0.00 |
| Habitat + SVL + Predator + Normalized Peak Velocity + Bird Color Space PC1 + Snake Color Space PC1 + Snake Color Space PC2 + Relative Maximum Bite Force + Habitat*SVL + Habitat*Normalized Peak Velocity + Habitat*Bird Color Space PC1 + Habitat*Snake Color Space PC1 + Habitat*Snake Color Space PC2 + Habitat*Relative Maximum Bite Force + Predator*SVL + Predator*Normalized Peak Velocity + Predator*Bird Color Space PC1 + Predator*Snake Color Space PC1 + Predator*Snake Color Space PC2 + Predator*Relative Maximum Bite Force | 20 | 138.97 | 142.98 | 0.00 |

Table S5. AICc model selection for free-falling behaviors. Individual was treated as a random factor. Abbreviations as in Supplementary Table 3. Models with a  $\Delta AICc < 2$  are denoted in bold.

| <b>Free-falling Models</b>                                                                                                                                                                                                                                                                                                                     | <b>K</b> | <b>AICc</b> | <b><math>\Delta AICc</math></b> | <b>wi</b> |
|------------------------------------------------------------------------------------------------------------------------------------------------------------------------------------------------------------------------------------------------------------------------------------------------------------------------------------------------|----------|-------------|---------------------------------|-----------|
| <b>Habitat</b>                                                                                                                                                                                                                                                                                                                                 | 1        | -342.78     | <b>0.00</b>                     | 1.00      |
| Habitat + SVL                                                                                                                                                                                                                                                                                                                                  | 2        | -329.23     | 13.55                           | 0.00      |
| Habitat + SVL + Normalized Peak Velocity                                                                                                                                                                                                                                                                                                       | 3        | -319.27     | 23.51                           | 0.00      |
| Habitat + SVL + Normalized Peak Velocity + Relative Maximum Bite Force                                                                                                                                                                                                                                                                         | 4        | -302.43     | 40.35                           | 0.00      |
| Habitat + SVL + Predator + Normalized Peak Velocity + Relative Maximum Bite Force                                                                                                                                                                                                                                                              | 5        | -292.66     | 50.12                           | 0.00      |
| Habitat + SVL + Predator + Normalized Peak Velocity + Bird Color Space PC1 + Relative Maximum Bite Force                                                                                                                                                                                                                                       | 6        | -279.96     | 62.82                           | 0.00      |
| Habitat + SVL + Predator + Normalized Peak Velocity + Bird Color Space PC1 + Snake Color Space PC1 + Relative Maximum Bite Force                                                                                                                                                                                                               | 7        | -269.07     | 73.72                           | 0.00      |
| Habitat + SVL + Predator + Normalized Peak Velocity + Bird Color Space PC1 + Snake Color Space PC1 + Snake Color Space PC2 + Relative Maximum Bite Force                                                                                                                                                                                       | 8        | -257.69     | 85.10                           | 0.00      |
| Habitat + SVL + Predator + Normalized Peak Velocity + Bird Color Space PC1 + Snake Color Space PC1 + Snake Color Space PC2 + Relative Maximum Bite Force + Habitat*SVL                                                                                                                                                                         | 9        | -245.16     | 97.63                           | 0.00      |
| Habitat + SVL + Predator + Normalized Peak Velocity + Bird Color Space PC1 + Snake Color Space PC1 + Snake Color Space PC2 + Relative Maximum Bite Force + Habitat*SVL + Habitat*Normalized Peak Velocity                                                                                                                                      | 10       | -236.24     | 106.54                          | 0.00      |
| Habitat + SVL + Predator + Normalized Peak Velocity + Bird Color Space PC1 + Snake Color Space PC1 + Snake Color Space PC2 + Relative Maximum Bite Force + Habitat*SVL + Habitat*Normalized Peak Velocity + Habitat*Bird Color Space PC1                                                                                                       | 11       | -224.64     | 118.14                          | 0.00      |
| Habitat + SVL + Predator + Normalized Peak Velocity + Bird Color Space PC1 + Snake Color Space PC1 + Snake Color Space PC2 + Relative Maximum Bite Force + Habitat*SVL + Habitat*Normalized Peak Velocity + Habitat*Bird Color Space PC1 + Habitat*Snake Color Space PC1                                                                       | 12       | 214.77      | 128.02                          | 0.00      |
| Habitat + SVL + Predator + Normalized Peak Velocity + Bird Color Space PC1 + Snake Color Space PC1 + Snake Color Space PC2 + Relative Maximum Bite Force + Habitat*SVL + Habitat*Normalized Peak Velocity + Habitat*Bird Color Space PC1 + Habitat*Snake Color Space PC1 + Habitat*Snake Color Space PC2                                       | 13       | -204.52     | 138.26                          | 0.00      |
| Habitat + SVL + Predator + Normalized Peak Velocity + Bird Color Space PC1 + Snake Color Space PC1 + Snake Color Space PC2 + Relative Maximum Bite Force + Habitat*SVL + Habitat*Normalized Peak Velocity + Habitat*Bird Color Space PC1 + Habitat*Snake Color Space PC1 + Habitat*Snake Color Space PC2 + Habitat*Relative Maximum Bite Force | 14       | -188.56     | 154.22                          | 0.00      |
| Habitat + SVL + Predator + Normalized Peak Velocity + Bird Color Space PC1 + Snake Color Space PC1 +                                                                                                                                                                                                                                           | 15       | -176.16     | 166.62                          | 0.00      |

|                                                                                                                                                                                                                                                                                                                                                                                                                                                                                                                                            |    |         |        |      |
|--------------------------------------------------------------------------------------------------------------------------------------------------------------------------------------------------------------------------------------------------------------------------------------------------------------------------------------------------------------------------------------------------------------------------------------------------------------------------------------------------------------------------------------------|----|---------|--------|------|
| Snake Color Space PC2 + Relative Maximum Bite Force + Habitat*SVL + Habitat*Normalized Peak Velocity + Habitat*Bird Color Space PC1 + Habitat*Snake Color Space PC1 + Habitat*Snake Color Space PC2 + Habitat*Relative Maximum Bite Force + Predator*SVL                                                                                                                                                                                                                                                                                   |    |         |        |      |
| Habitat + SVL + Predator + Normalized Peak Velocity + Bird Color Space PC1 + Snake Color Space PC1 + Snake Color Space PC2 + Relative Maximum Bite Force + Habitat*SVL + Habitat*Normalized Peak Velocity + Habitat*Bird Color Space PC1 + Habitat*Snake Color Space PC1 + Habitat*Snake Color Space PC2 + Habitat*Relative Maximum Bite Force + Predator*SVL + Predator*Normalized Peak Velocity                                                                                                                                          | 16 | -167.06 | 175.72 | 0.00 |
| Habitat + SVL + Predator + Normalized Peak Velocity + Bird Color Space PC1 + Snake Color Space PC1 + Snake Color Space PC2 + Relative Maximum Bite Force + Habitat*SVL + Habitat*Normalized Peak Velocity + Habitat*Bird Color Space PC1 + Habitat*Snake Color Space PC1 + Habitat*Snake Color Space PC2 + Habitat*Relative Maximum Bite Force + Predator*SVL + Predator*Normalized Peak Velocity + Predator*Bird Color Space PC1                                                                                                          | 17 | -155.12 | 187.66 | 0.00 |
| Habitat + SVL + Predator + Normalized Peak Velocity + Bird Color Space PC1 + Snake Color Space PC1 + Snake Color Space PC2 + Relative Maximum Bite Force + Habitat*SVL + Habitat*Normalized Peak Velocity + Habitat*Bird Color Space PC1 + Habitat*Snake Color Space PC1 + Habitat*Snake Color Space PC2 + Habitat*Relative Maximum Bite Force + Predator*SVL + Predator*Normalized Peak Velocity + Predator*Bird Color Space PC1 + Predator*Snake Color Space PC1                                                                         | 18 | -144.89 | 197.90 | 0.00 |
| Habitat + SVL + Predator + Normalized Peak Velocity + Bird Color Space PC1 + Snake Color Space PC1 + Snake Color Space PC2 + Relative Maximum Bite Force + Habitat*SVL + Habitat*Normalized Peak Velocity + Habitat*Bird Color Space PC1 + Habitat*Snake Color Space PC1 + Habitat*Snake Color Space PC2 + Habitat*Relative Maximum Bite Force + Predator*SVL + Predator*Normalized Peak Velocity + Predator*Bird Color Space PC1 + Predator*Snake Color Space PC1 + Predator*Snake Color Space PC2                                        | 19 | -133.84 | 208.94 | 0.00 |
| Habitat + SVL + Predator + Normalized Peak Velocity + Bird Color Space PC1 + Snake Color Space PC1 + Snake Color Space PC2 + Relative Maximum Bite Force + Habitat*SVL + Habitat*Normalized Peak Velocity + Habitat*Bird Color Space PC1 + Habitat*Snake Color Space PC1 + Habitat*Snake Color Space PC2 + Habitat*Relative Maximum Bite Force + Predator*SVL + Predator*Normalized Peak Velocity + Predator*Bird Color Space PC1 + Predator*Snake Color Space PC1 + Predator*Snake Color Space PC2 + Predator*Relative Maximum Bite Force | 20 | -117.33 | 225.45 | 0.00 |

**Table S6.** AICc model selection for leaf-mimicking behaviors. Individual was treated as a random factor. Abbreviations as in Supplementary Table 3. Models with a  $\Delta AICc < 2$  are denoted in bold.

| <b>Leaf-mimicking Models</b>                                                                                                                                                                                                                                                                                                                   | <b>K</b> | <b>AICc</b> | <b><math>\Delta AICc</math></b> | <b>wi</b> |
|------------------------------------------------------------------------------------------------------------------------------------------------------------------------------------------------------------------------------------------------------------------------------------------------------------------------------------------------|----------|-------------|---------------------------------|-----------|
| <b>Habitat</b>                                                                                                                                                                                                                                                                                                                                 | 1        | -288.21     | <b>0.00</b>                     | 1.00      |
| Habitat + SVL                                                                                                                                                                                                                                                                                                                                  | 2        | -275.50     | 12.71                           | 0.00      |
| Habitat + SVL + Normalized Peak Velocity                                                                                                                                                                                                                                                                                                       | 3        | -266.81     | 21.40                           | 0.00      |
| Habitat + SVL + Normalized Peak Velocity + Relative Maximum Bite Force                                                                                                                                                                                                                                                                         | 4        | -250.68     | 37.53                           | 0.00      |
| Habitat + SVL + Predator + Normalized Peak Velocity + Relative Maximum Bite Force                                                                                                                                                                                                                                                              | 5        | -242.92     | 45.29                           | 0.00      |
| Habitat + SVL + Predator + Normalized Peak Velocity + Bird Color Space PC1 + Relative Maximum Bite Force                                                                                                                                                                                                                                       | 6        | -231.18     | 57.03                           | 0.00      |
| Habitat + SVL + Predator + Normalized Peak Velocity + Bird Color Space PC1 + Snake Color Space PC1 + Relative Maximum Bite Force                                                                                                                                                                                                               | 7        | -221.27     | 66.94                           | 0.00      |
| Habitat + SVL + Predator + Normalized Peak Velocity + Bird Color Space PC1 + Snake Color Space PC1 + Snake Color Space PC2 + Relative Maximum Bite Force                                                                                                                                                                                       | 8        | -210.27     | 77.94                           | 0.00      |
| Habitat + SVL + Predator + Normalized Peak Velocity + Bird Color Space PC1 + Snake Color Space PC1 + Snake Color Space PC2 + Relative Maximum Bite Force + Habitat*SVL                                                                                                                                                                         | 9        | -198.60     | 89.61                           | 0.00      |
| Habitat + SVL + Predator + Normalized Peak Velocity + Bird Color Space PC1 + Snake Color Space PC1 + Snake Color Space PC2 + Relative Maximum Bite Force + Habitat*SVL + Habitat*Normalized Peak Velocity                                                                                                                                      | 10       | -190.94     | 97.27                           | 0.00      |
| Habitat + SVL + Predator + Normalized Peak Velocity + Bird Color Space PC1 + Snake Color Space PC1 + Snake Color Space PC2 + Relative Maximum Bite Force + Habitat*SVL + Habitat*Normalized Peak Velocity + Habitat*Bird Color Space PC1                                                                                                       | 11       | -180.24     | 107.97                          | 0.00      |
| Habitat + SVL + Predator + Normalized Peak Velocity + Bird Color Space PC1 + Snake Color Space PC1 + Snake Color Space PC2 + Relative Maximum Bite Force + Habitat*SVL + Habitat*Normalized Peak Velocity + Habitat*Bird Color Space PC1 + Habitat*Snake Color Space PC1                                                                       | 12       | -171.56     | 116.65                          | 0.00      |
| Habitat + SVL + Predator + Normalized Peak Velocity + Bird Color Space PC1 + Snake Color Space PC1 + Snake Color Space PC2 + Relative Maximum Bite Force + Habitat*SVL + Habitat*Normalized Peak Velocity + Habitat*Bird Color Space PC1 + Habitat*Snake Color Space PC1 + Habitat*Snake Color Space PC2                                       | 13       | -161.70     | 126.51                          | 0.00      |
| Habitat + SVL + Predator + Normalized Peak Velocity + Bird Color Space PC1 + Snake Color Space PC1 + Snake Color Space PC2 + Relative Maximum Bite Force + Habitat*SVL + Habitat*Normalized Peak Velocity + Habitat*Bird Color Space PC1 + Habitat*Snake Color Space PC1 + Habitat*Snake Color Space PC2 + Habitat*Relative Maximum Bite Force | 14       | -146.26     | 141.95                          | 0.00      |
| Habitat + SVL + Predator + Normalized Peak Velocity + Bird Color Space PC1 + Snake Color Space PC1 +                                                                                                                                                                                                                                           | 15       | -134.21     | 154.00                          | 0.00      |

|                                                                                                                                                                                                                                                                                                                                                                                                                                                                                                                                            |    |         |        |      |
|--------------------------------------------------------------------------------------------------------------------------------------------------------------------------------------------------------------------------------------------------------------------------------------------------------------------------------------------------------------------------------------------------------------------------------------------------------------------------------------------------------------------------------------------|----|---------|--------|------|
| Snake Color Space PC2 + Relative Maximum Bite Force + Habitat*SVL + Habitat*Normalized Peak Velocity + Habitat*Bird Color Space PC1 + Habitat*Snake Color Space PC1 + Habitat*Snake Color Space PC2 + Habitat*Relative Maximum Bite Force + Predator*SVL                                                                                                                                                                                                                                                                                   |    |         |        |      |
| Habitat + SVL + Predator + Normalized Peak Velocity + Bird Color Space PC1 + Snake Color Space PC1 + Snake Color Space PC2 + Relative Maximum Bite Force + Habitat*SVL + Habitat*Normalized Peak Velocity + Habitat*Bird Color Space PC1 + Habitat*Snake Color Space PC1 + Habitat*Snake Color Space PC2 + Habitat*Relative Maximum Bite Force + Predator*SVL + Predator*Normalized Peak Velocity                                                                                                                                          | 16 | -126.16 | 162.05 | 0.00 |
| Habitat + SVL + Predator + Normalized Peak Velocity + Bird Color Space PC1 + Snake Color Space PC1 + Snake Color Space PC2 + Relative Maximum Bite Force + Habitat*SVL + Habitat*Normalized Peak Velocity + Habitat*Bird Color Space PC1 + Habitat*Snake Color Space PC1 + Habitat*Snake Color Space PC2 + Habitat*Relative Maximum Bite Force + Predator*SVL + Predator*Normalized Peak Velocity + Predator*Bird Color Space PC1                                                                                                          | 17 | -115.08 | 173.14 | 0.00 |
| Habitat + SVL + Predator + Normalized Peak Velocity + Bird Color Space PC1 + Snake Color Space PC1 + Snake Color Space PC2 + Relative Maximum Bite Force + Habitat*SVL + Habitat*Normalized Peak Velocity + Habitat*Bird Color Space PC1 + Habitat*Snake Color Space PC1 + Habitat*Snake Color Space PC2 + Habitat*Relative Maximum Bite Force + Predator*SVL + Predator*Normalized Peak Velocity + Predator*Bird Color Space PC1 + Predator*Snake Color Space PC1                                                                         | 18 | -105.98 | 182.23 | 0.00 |
| Habitat + SVL + Predator + Normalized Peak Velocity + Bird Color Space PC1 + Snake Color Space PC1 + Snake Color Space PC2 + Relative Maximum Bite Force + Habitat*SVL + Habitat*Normalized Peak Velocity + Habitat*Bird Color Space PC1 + Habitat*Snake Color Space PC1 + Habitat*Snake Color Space PC2 + Habitat*Relative Maximum Bite Force + Predator*SVL + Predator*Normalized Peak Velocity + Predator*Bird Color Space PC1 + Predator*Snake Color Space PC1 + Predator*Snake Color Space PC2                                        | 19 | -95.72  | 192.50 | 0.00 |
| Habitat + SVL + Predator + Normalized Peak Velocity + Bird Color Space PC1 + Snake Color Space PC1 + Snake Color Space PC2 + Relative Maximum Bite Force + Habitat*SVL + Habitat*Normalized Peak Velocity + Habitat*Bird Color Space PC1 + Habitat*Snake Color Space PC1 + Habitat*Snake Color Space PC2 + Habitat*Relative Maximum Bite Force + Predator*SVL + Predator*Normalized Peak Velocity + Predator*Bird Color Space PC1 + Predator*Snake Color Space PC1 + Predator*Snake Color Space PC2 + Predator*Relative Maximum Bite Force | 20 | -79.85  | 208.36 | 0.00 |
